# Supplementary material
Source: MDPI journal article supplement (https://www.mdpi.com/2073-4352/12/12/1826)
Supplement: s1 [file s1]

Supplementary data:

Dewetting Process in Ni-Mn-Ga Shape-Memory Heusler: Effects on Morphology, Stoichiometry and Magnetic Properties

M. Takhsha Ghahfarokhi <sup>1\*</sup>, F. Celegato <sup>2</sup>, G. Barrera <sup>2</sup>, F. Casoli <sup>1\*</sup>, P. Tiberto <sup>2</sup>, and F. Albertini <sup>1</sup>

<sup>1</sup> Institute of Materials for Electronics and Magnetism - National Research Council (IMEM-CNR), Parco Area delle Scienze 37/A, 43124 Parma, Italy

<sup>2</sup> Advanced Materials Metrology and Life Sciences (INRiM), Strada delle Cacce 91, 10135 Turin, Italy

(\* Corresponding Author)

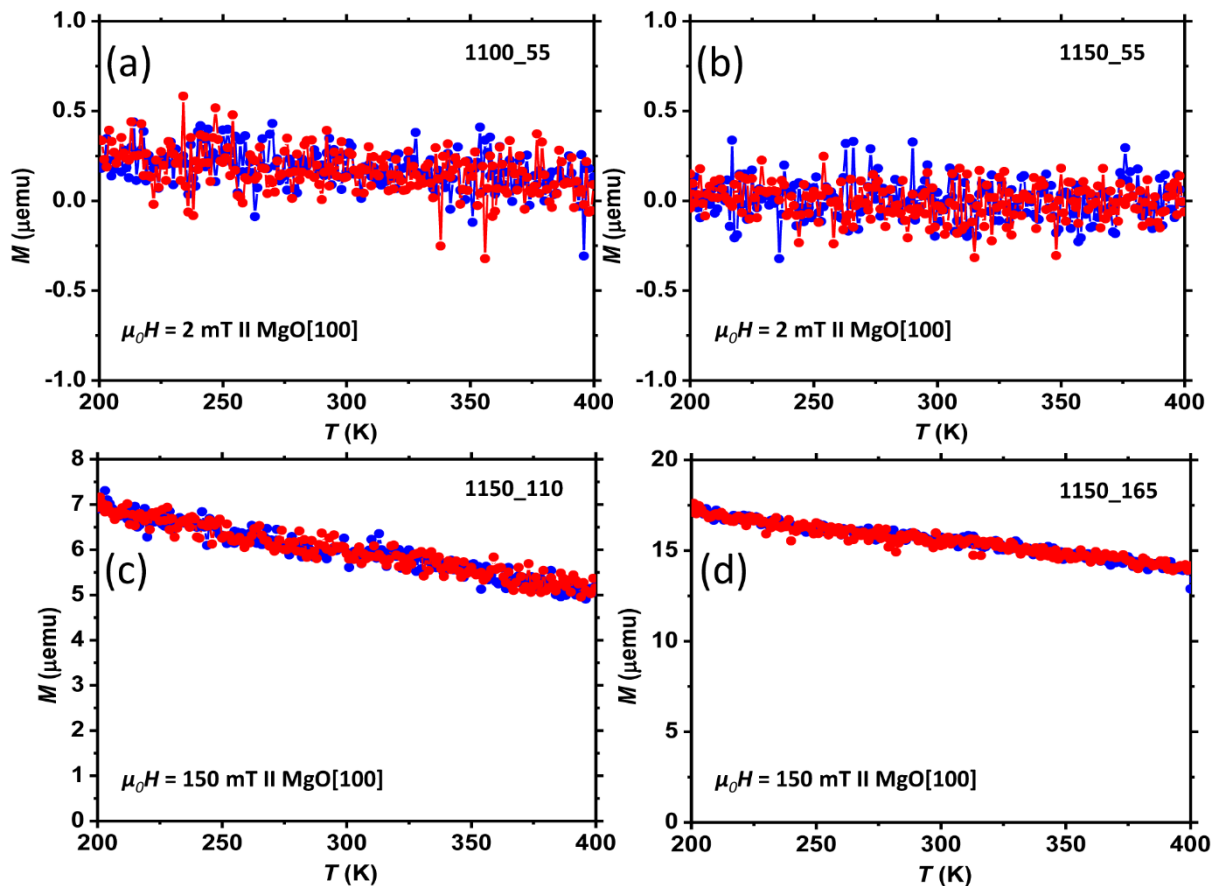

Figure S1: Thermomagnetic curves of the annealed samples for the temperature range of 200-400 K: (a) 1100\_55, (b) 1150\_55 applying low magnetic field ( $\mu_0H = 2$  mT) in the plane of the film along MgO[100]; (c) 1150\_110, (d) 1150\_165 applying magnetic field of ( $\mu_0H = 150$  mT) in the plane of the film along MgO[100].
